# Supplementary material for: Immune genes and divergent antimicrobial peptides in flies of the subgenus Drosophila
Source: PubMed Central journal article supplement (PMC5078906; doi:10.1186/s12862-016-0805-y), 2016-10-24

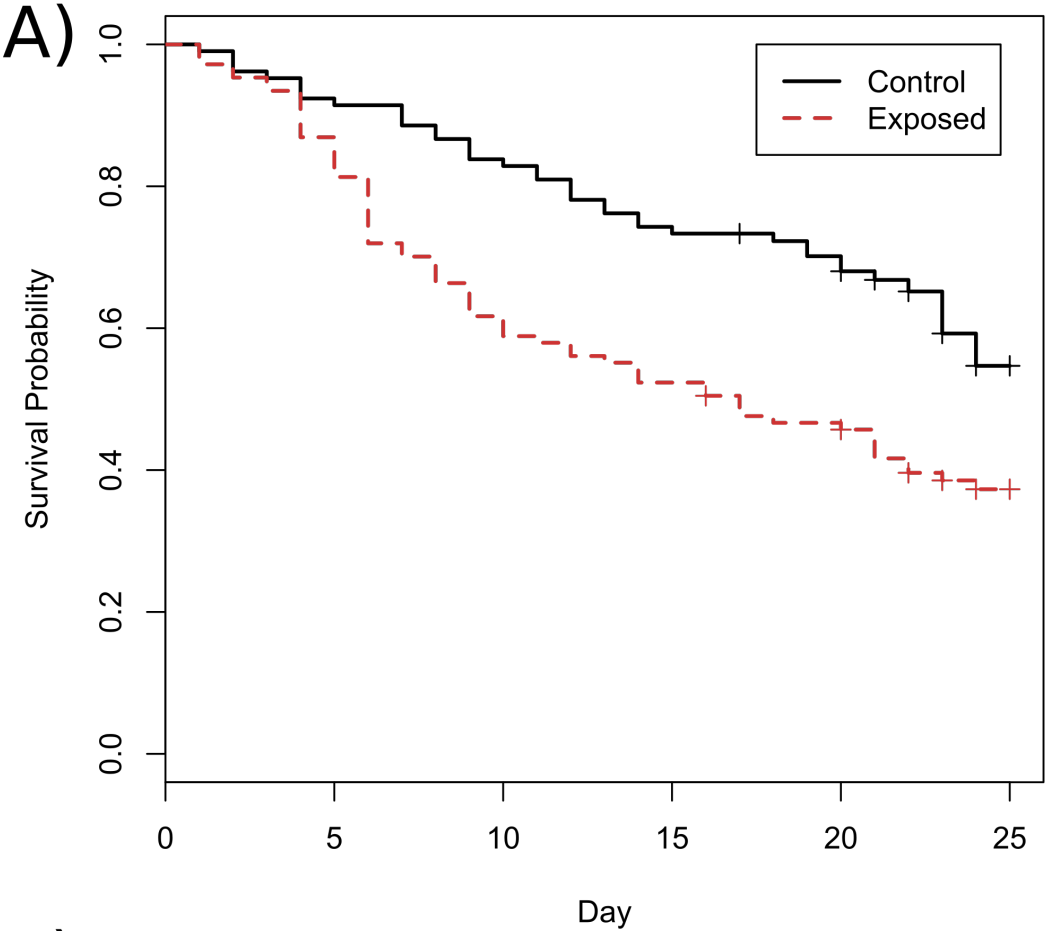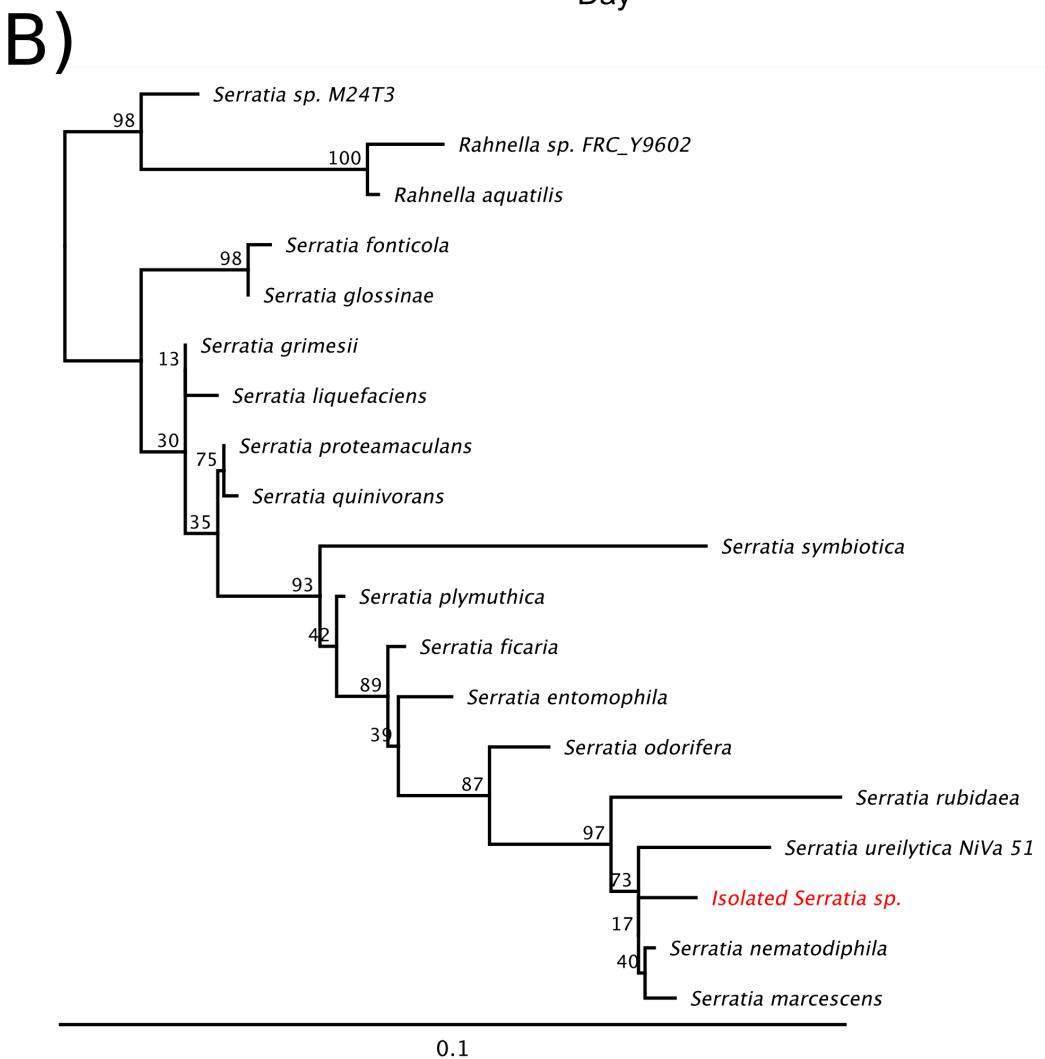

Supplement: 12862_2016_805_MOESM2_ESM.pdf [file 12862_2016_805_MOESM2_ESM.pdf]
